# Supplementary material
Source: publisher site journal article supplement (https://www.dovepress.com/article/324315)
Supplement: Supplementary file 1 [file get_supplementary_file.php]

Supplementary materials for

**Estimated thresholds of minimum necessary adherence for effective treatment with direct oral anticoagulants – a retrospective cohort study in health insurance claims data**

Wirbka et al

**This file includes:**

Supplementary Tables 1 – 7

Supplementary Figure 1

Supplementary Material 1

**Supplementary Table 1.** Inclusion and exclusion criteria with operationalization

| **Condition** | **Operationalization** |
| --- | --- |
| **Inclusion criteria** | |
| Permanent statutory insurance coverage from 01/JAN/2013 to december 31/DEC/2018,  ≥ 18 years old, and prescribed at least one DOAC | - ≥ 18 years of age in the year 2013 - Continuously insured with AOK - First DOAC prescription after 01/JAN/2014with at least 1 prescription |
| Patients newly prescribed apixaban (ATC B01AF02), dabigatran (B01AE07), or rivaroxaban (B01AF01) after 01/JAN/2014 and diagnosed with atrial fibrillation or flutter before the respective index date. | Diagnosis of atrial fibrillation (ICD: I48.1, I48.2, I48.3, I48.4, I48.9) in the year/4 quarters before the index date |
| Male and CHA2DS2-VASc-Score < 2    Female and CHA2DS2-VASc-Score = 0 | Scoring according to: Lip GY, Nieuwlaat R, Pisters R, Lane DA, Crijns HJ. Refining clinical risk stratification for predicting stroke and thromboembolism in atrial fibrillation using a novel risk factor-based approach: the euro heart survey on atrial fibrillation. Chest 2010;137:263-72. |
| **Exclusion Criteria** | |
| Elective joint replacement | OPS codes: 5-820.X, 5-822.X 8 weeks before index date |
| Deep vein thrombosis | ICD-10 codes: I80.1, I80.2, I80.3, I80.81 6 months before index date |
| Pulmonary embolism | ICD-10 codes: I26.0, I26.9 6 months before index date |
| Mitral stenosis | ICD-10 codes: I05.0, I05.2, I08.0, I08.1, I08.3, I08.8, I08.9, Q23.2 in the year before index date |
| Mechanical heart valve inserted | OPS codes: 5-354.08, 5-354.28 6 months before Index |
| Dialysis | ICD-10 codes: Z49.1, Z49.2 / OPS: 8-854.X, 8-857.X in the year before index date |
| Kidney transplantation | ICD-10 codes: Z94.0 / OPS: 5-555.X in the year before index date |
| DOAC switching | Only one ATC code for one specific DOAC prescribed throughout the entire follow-up time |
| Less than two years of follow-up or missing data | Less than two years of follow-up time (Less than two years between index date and end date) or missing data |
| Minority of full dose prescriptions | Fewer prescribed packages of tablet strength equal to the full dose than prescribed packages of tablet strength different from the full dose |

ATC: anatomical therapeutic chemical classification system; DOAC: direct oral anticoagulant; ICD-10: international classification of diseases, 10th revision; OPS: operation and procedure codes.

**Supplementary Table 2.** Outcome operationalization

| **Outcome** | |
| --- | --- |
| **Condition** | **Operationalization** |
| Stroke | Hospital admission with ICD-10 code I63.X or I64.X according to:  Paschke LM, Klimke K, Altiner A, von Stillfried D, Schulz M. Comparing stroke prevention therapy of direct oral anticoagulants and vitamin K antagonists in patients with atrial fibrillation: a nationwide retrospective observational study. BMC Med 2020;18:254; |

ICD-10: international classification of diseases, 10th revision.

**Supplementary Table 3.** STROBE checklist

|  | Item No | Recommendation | Page in manuscript |
| --- | --- | --- | --- |
| **Title and abstract** | 1 | (*a*) Indicate the study’s design with a commonly used term in the title or the abstract | 1 |
| (*b*) Provide in the abstract an informative and balanced summary of what was done and what was found | 2,3 |
| Introduction | | | |
| Background/rationale | 2 | Explain the scientific background and rationale for the investigation being reported | 4,5 |
| Objectives | 3 | State specific objectives, including any prespecified hypotheses | 4,5 |
| Methods | | | |
| Study design | 4 | Present key elements of study design early in the paper | 6 |
| Setting | 5 | Describe the setting, locations, and relevant dates, including periods of recruitment, exposure, follow-up, and data collection | 6 |
| Participants | 6 | (*a*) Give the eligibility criteria, and the sources and methods of selection of participants. Describe methods of follow-up | 6 |
| (*b*)For matched studies, give matching criteria and number of exposed and unexposed | - |
| Variables | 7 | Clearly define all outcomes, exposures, predictors, potential confounders, and effect modifiers. Give diagnostic criteria, if applicable | 7,8 |
| Data sources/ measurement | 8 | For each variable of interest, give sources of data and details of methods of assessment (measurement). Describe comparability of assessment methods if there is more than one group | Supplement |
| Bias | 9 | Describe any efforts to address potential sources of bias | 8 |
| Study size | 10 | Explain how the study size was arrived at | 6, Figure 1 |
| Quantitative variables | 11 | Explain how quantitative variables were handled in the analyses. If applicable, describe which groupings were chosen and why | 8 |
| Statistical methods | 12 | (*a*) Describe all statistical methods, including those used to control for confounding | 9,10,11 |
| (*b*) Describe any methods used to examine subgroups and interactions | 9,10,11 |
| (*c*) Explain how missing data were addressed | 9,10,11 |
| (*d*) If applicable, explain how loss to follow-up was addressed | 9,10,11 |
| (*e*) Describe any sensitivity analyses | 9,10,11 |
| Results | | | |
| Participants | 13 | (a) Report numbers of individuals at each stage of study – eg, numbers potentially eligible, examined for eligibility, confirmed eligible, included in the study, completing follow-up, and analysed | Figure 1 |
| (b) Give reasons for non-participation at each stage | Figure 1 |
| (c) Consider use of a flow diagram | Figure 1 |
| Descriptive data | 14* | (a) Give characteristics of study participants (eg, demographic, clinical, social) and information on exposures and potential confounders | 12 |
| (b) Indicate number of participants with missing data for each variable of interest | - |
| (c) Summarise follow-up time (eg, average and total amount) | 12,13 |
| Outcome data | 15 | Report numbers of outcome events or summary measures over time | 12,Table 1 |
| Main results | 16 | (*a*) Give unadjusted estimates and, if applicable, confounder-adjusted estimates and their precision (eg, 95% confidence interval). Make clear which confounders were adjusted for and why they were included | 12,13,14 |
| (*b*) Report category boundaries when continuous variables were categorized | 12,13,14 |
| (*c*) If relevant, consider translating estimates of relative risk into absolute risk for a meaningful time period | - |
| Other analyses | 17 | Report other analyses done - eg, analyses of subgroups and interactions, and sensitivity analyses | 12,13,14 |
| Discussion | | | |
| Key results | 18 | Summarise key results with reference to study objectives | 14 |
| Limitations | 19 | Discuss limitations of the study, taking into account sources of potential bias or imprecision. Discuss both direction and magnitude of any potential bias | 16,17 |
| Interpretation | 20 | Give a cautious overall interpretation of results considering objectives, limitations, multiplicity of analyses, results from similar studies, and other relevant evidence | 14,15,16,17 |
| Generalisability | 21 | Discuss the generalisability (external validity) of the study results | 14,15,16,17 |
| Other information | | | |
| Funding | 22 | Give the source of funding and the role of the funders for the present study and, if applicable, for the original study on which the present article is based | 18 |

**Supplementary Table 4**. Variables used to adjust for confounding

| **Predictor** | **Operationalization** | **Explanation** |
| --- | --- | --- |
| Age | continuous | The age in years at the index date |
| Sex | binary | Female = 0 / Male = 1 |
| Hypertension uncomplicated | binary | ICD-10 codes: I10.X |
| Hypertension complicated | binary | ICD-10 codes: I11.X - I13.X, I15.X |
| Heart failure |  | ICD-10 codes: I09.9, I11.0, I13.0, I13.2, I25.5, I42.0, I42.5 - I42.9, I43.X, I50.X, P29.0 |
| Diabetes uncomplicated | binary | ICD-10 codes: E10.0, E10.1, E10.9, E11.0, E11.1, E11.9, E12.0, E12.1, E12.9, E13.0, E13.1, E13.9, E14.0, E14.1, E14.9 |
| Diabetes complicated | binary | ICD-10 codes: E10.2 - E10.8, E11.2 - E11.8, E12.2 - E12.8, E13.2 - E13.8, E14.2 - E14.8 |
| Stroke | binary | ICD-10 codes: I64.X, I63.X |
| Myocardial infarction | binary | ICD-10 codes: I21.X |
| CHA2DS2-VASc Score | continuous | Scoring according to: Lip GY, Nieuwlaat R, Pisters R, Lane DA, Crijns HJ. Refining clinical risk stratification for predicting stroke and thromboembolism in atrial fibrillation using a novel risk factor-based approach: the euro heart survey on atrial fibrillation. Chest 2010;137:263-72. |
| Renal disease | binary | ICD-10 codes: I12.0, I13.1, N03.2 - N03.7, N05.2 - N05.7, N18.X, N19.x, N25.0, Z49.0 - Z49.2, Z94.0, Z99.2 |
| Chronic liver disease | binary | ICD-10 codes: B18.X, I85.X, I86.4, I98.2, K70.X, K71.1, K71.3 - K71.5, K71.7, K72.X - K74.X, K76.0, K76.2 - K76.9, Z94.4 |
| Peripheral vascular disease | binary | ICD-10 codes: I70.X, I71.X, I73.1, I73.8, I73.9, I77.1, I79.0, I79.2, K55.1, K55.8, K55.9, Z95.8, Z95.9 |
| Depression | binary | ICD-10 codes: F20.4, F31.3 - F31.5, F32.X, F33.X, F34.1, F41.2, F43.2 |
| Alcohol abuse | binary | ICD-10 codes: F10, E52, G62.1, I42.6, K29.2, K70.0, K70.3, K70.9, T51.X, Z50.2, Z71.4, Z72.1 |
| Drug abuse | binary | ICD-10 codes: F11.X - F16.X, F18.X, F19.X, Z71.5, Z72.2 |
| Antiplatelet before | binary | ATC code: B01ACXX |
| Vitamin K antagonist before | binary | ATC code: B01AAXX |
| Number of ATC codes | continuous | Number of different ATC codes in the year before the index date |
| Number of hospitalization | continuous | Number of hospitalizations in the year before the index date |

ATC: anatomical therapeutic chemical classification system; ICD-10: international classification of diseases, 10th revision.

**Supplementary Table 5.** Estimated doses of direct oral anticoagulants and associated PDC values for the models in Figure 2.

| **Percentage of estimated doses (ED) taken** | **Proportion of days covered with medication (PDC) values** | |
| --- | --- | --- |
| **Apixaban** | **Rivaroxaban** |
| ED 50 | 0.49 | 0.48 |
| ED 60 | 0.57 | 0.56 |
| ED 70 | 0.67 | 0.66 |
| ED 80 | 0.80 | 0.78 |
| ED 90 | 0.98 | 0.96 |

**Supplementary Table 6.** Baseline characteristics of the study-cohort patients who were younger than 65 years

| Characteristic | Dabigatran | Rivaroxaban | Apixaban | Total | Comparison  rivaroxaban vs. apixaban  (p-value) | Comparison  rivaroxaban vs. apixaban  (standardized difference) |
| --- | --- | --- | --- | --- | --- | --- |
| **Patients**, N | 144 | 865 | 547 | 1556 |  |  |
| **Age in years**, mean ± SD | 57.1 ± 6.8 | 57.5 ± 5.9 | 57.9 ± 6.3 | 57.6 ± 6.1 | = 0.366 | 0.037 |
| **Female sex**, N (%) | 35 (24) | 225 (26) | 152 (28) | 412 (26) | = 0.615 | 0.022 |
| **Outcome stroke**, N (%) | 3 (2) | 3 (0) | 6 (1) | 12 (1) | = 0.302 | 0.056 |
| **Proportion of days covered (PDC)** |  |  |  |  |  |  |
| mean ± SD | 0.74 ± 0.34 | 0.75 ± 0.32 | 0.79 ± 0.30 | 0.76 ± 0.31 | = 0.157 | 0.058 |
| median (IQR) | 0.92 (0.60,0.99) | 0.93 (0.57,0.99) | 0.96 (0.65,1.00) | 0.94 (0.60,1.00) |
| **Median follow-up time**, days (IQR) | 1432 (1133,1673) | 1295 (1048,1560) | 1138 (936,1363) | 1251 (1001,1518) | < 0.001 | 0.243 |
| **Comorbidities** |  |  |  |  |  |  |
| Hypertension, N (%) | 135 (94) | 802 (93) | 524 (96) | 1461 (94) | = 0.094 | 0.070 |
| Heart failure, N (%) | 81 (56) | 512 (59) | 357 (65) | 950 (61) | = 0.096 | 0.070 |
| Diabetes, N (%) | 48 (33) | 316 (37) | 218 (40) | 582 (37) | = 0.371 | 0.038 |
| Prior stroke, N (%) | 23 (16) | 60 (7) | 65 (12) | 148 (10) | = 0.021 | 0.100 |
| Prior myocardial infarction, N (%) | 11 (8) | 71 (8) | 55 (10) | 137 (9) | = 0.415 | 0.037 |
| Renal disease, N (%) | 16 (11) | 114 (13) | 93 (17) | 223 (14) | = 0.155 | 0.061 |
| Chronic liver disease, N (%) | 20 (14) | 169 (20) | 93 (17) | 282 (18) | = 0.401 | 0.036 |
| Peripheral vascular disease, N (%) | 18 (12) | 142 (16) | 107 (20) | 267 (17) | = 0.282 | 0.046 |
| Depression, N (%) | 26 (18) | 153 (18) | 99 (18) | 278 (18) | = 0.926 | 0.006 |
| Alcohol abuse, N (%) | 20 (14) | 106 (12) | 63 (12) | 189 (12) | = 0.805 | 0.013 |
| Drug abuse, N (%) | 0 (0) | 10 (1) | 3 (1) | 13 (1) | = 0.512 | 0.034 |
| **Comedication** |  |  |  |  |  |  |
| Antiplatelet before, N (%) | 22 (15) | 129 (15) | 94 (17) | 245 (16) | = 0.426 | 0.035 |
| Vitamin K antagonist before, N (%) | 17 (12) | 159 (18) | 109 (20) | 285 (18) | = 0.626 | 0.022 |
| **CHA2DS2-VASc Score**,median (IQR) | 2 (2,3) | 2 (2,3) | 2 (2,3) | 2 (2,3) | = 0.622 | 0.012 |
| **Healthcare utilization** |  |  |  |  |  |  |
| Median number of hospitalizations (IQR) | 4 (2,8) | 4 (2,7) | 4 (2,8) | 4 (2,8) | = 0.770 | 0.012 |
| Median number of ATC codes (IQR) | 17 (12,25) | 18 (13,26) | 20 (14,28) | 19 (13,27) | = 0.196 | 0.053 |

Notes: ATC: anatomical therapeutic chemical classification system; CHA2DS2-VASc score components include congestive heart failure (1 point), hypertension (1 point), age (≥ 75 years: 2 points; 65-74 years: 1 point), diabetes mellitus (1 point), prior stroke (2 points), vascular disease (1 point), and female sex (1 point); IQR: interquartile range; N: number; SD: standard deviation.

**Supplementary Table 7.** Baseline characteristics of the study-cohort patients who were older (or equal) than 65 years

| Characteristic | Dabigatran | Rivaroxaban | Apixaban | Total | Comparison  rivaroxaban vs. apixaban  (p-value) | Comparison  rivaroxaban vs. apixaban  (standardized difference) |
| --- | --- | --- | --- | --- | --- | --- |
| **Patients**, N | 604 | 4453 | 3479 | 8536 |  |  |
| **Age in years**, mean ± SD | 77.1 ± 7.0 | 77.2 ± 6.4 | 78.1 ± 6.4 | 77.6 ± 6.5 | < 0.001 | 0.081 |
| **Female sex**, N (%) | 305 (50) | 2394 (54) | 1946 (56) | 4645 (54) | = 0.136 | 0.027 |
| **Outcome stroke**, N (%) | 29 (5) | 90 (2) | 79 (2) | 198 (2) | = 0.592 | 0.011 |
| **Proportion of days covered (PDC)** |  |  |  |  |  |  |
| mean ± SD | 0.69 ± 0.32 | 0.81 ± 0.28 | 0.81 ± 0.26 | 0.80 ± 0.28 | = 0.766 | 0.005 |
| median (IQR) | 0.83 (0.46, 0.97) | 0.96 (0.71, 1.00) | 0.94 (0.71, 0.99) | 0.95 (0.69, 1.00) |
| **Median follow-up time**, days (IQR) | 1363 (1040,1623) | 1279 (1022,1525) | 1120 (909,1375) | 1215 (965,1480) | < 0.001 | 0.235 |
| **Comorbidities** |  |  |  |  |  |  |
| Hypertension, N (%) | 587 (97) | 4210 (95) | 3353 (96) | 8150 (95) | = 0.003 | 0.052 |
| Heart failure, N (%) | 311 (51) | 2181 (49) | 1927 (55) | 4419 (52) | < 0.001 | 0.078 |
| Diabetes, N (%) | 297 (49) | 2066 (46) | 1731 (50) | 4094 (48) | = 0.021 | 0.041 |
| Prior stroke, N (%) | 129 (21) | 459 (10) | 618 (18) | 1206 (14) | < 0.001 | 0.137 |
| Prior myocardial infarction, N (%) | 60 (10) | 403 (9) | 364 (10) | 827 (10) | = 0.105 | 0.029 |
| Renal disease, N (%) | 134 (22) | 1032 (23) | 1207 (35) | 2373 (28) | < 0.001 | 0.159 |
| Chronic liver disease, N (%) | 85 (14) | 593 (13) | 540 (16) | 1218 (14) | = 0.032 | 0.039 |
| Peripheral vascular disease, N (%) | 148 (25) | 939 (21) | 905 (26) | 1992 (23) | < 0.001 | 0.072 |
| Depression, N (%) | 90 (15) | 841 (19) | 699 (20) | 1630 (19) | = 0.303 | 0.019 |
| Alcohol abuse, N (%) | 25 (4) | 134 (3) | 107 (3) | 266 (3) | = 0.935 | 0.002 |
| Drug abuse, N (%) | 7 (1) | 38 (1) | 36 (1) | 81 (1) | = 0.576 | 0.012 |
| **Comedication** |  |  |  |  |  |  |
| Antiplatelet before, N (%) | 118 (20) | 737 (17) | 690 (20) | 1545 (18) | = 0.003 | 0.053 |
| Vitamin K antagonist before, N (%) | 184 (30) | 1409 (32) | 1175 (34) | 2768 (32) | = 0.121 | 0.028 |
| **CHA2DS2-VASc Score**,median (IQR) | 4 (3,5) | 4.00 (3,5) | 4 (3,5) | 4 (3,5) | < 0.001 | 0.106 |
| **Healthcare utilization** |  |  |  |  |  |  |
| Median number of hospitalizations (IQR) | 4 (3,8) | 4 (2,7) | 5 (3,7) | 4 (2,7) | < 0.001 | 0.070 |
| Median number of ATC codes (IQR) | 22 (16,29) | 22 (16,29) | 23 (17,30) | 22 (16,29) | < 0.001 | 0.062 |

Notes: ATC: anatomical therapeutic chemical classification system; CHA2DS2-VASc score components include congestive heart failure (1 point), hypertension (1 point), age (≥ 75 years: 2 points; 65-74 years: 1 point), diabetes mellitus (1 point), prior stroke (2 points), vascular disease (1 point), and female sex (1 point); IQR: interquartile range; N: number; SD: standard deviation


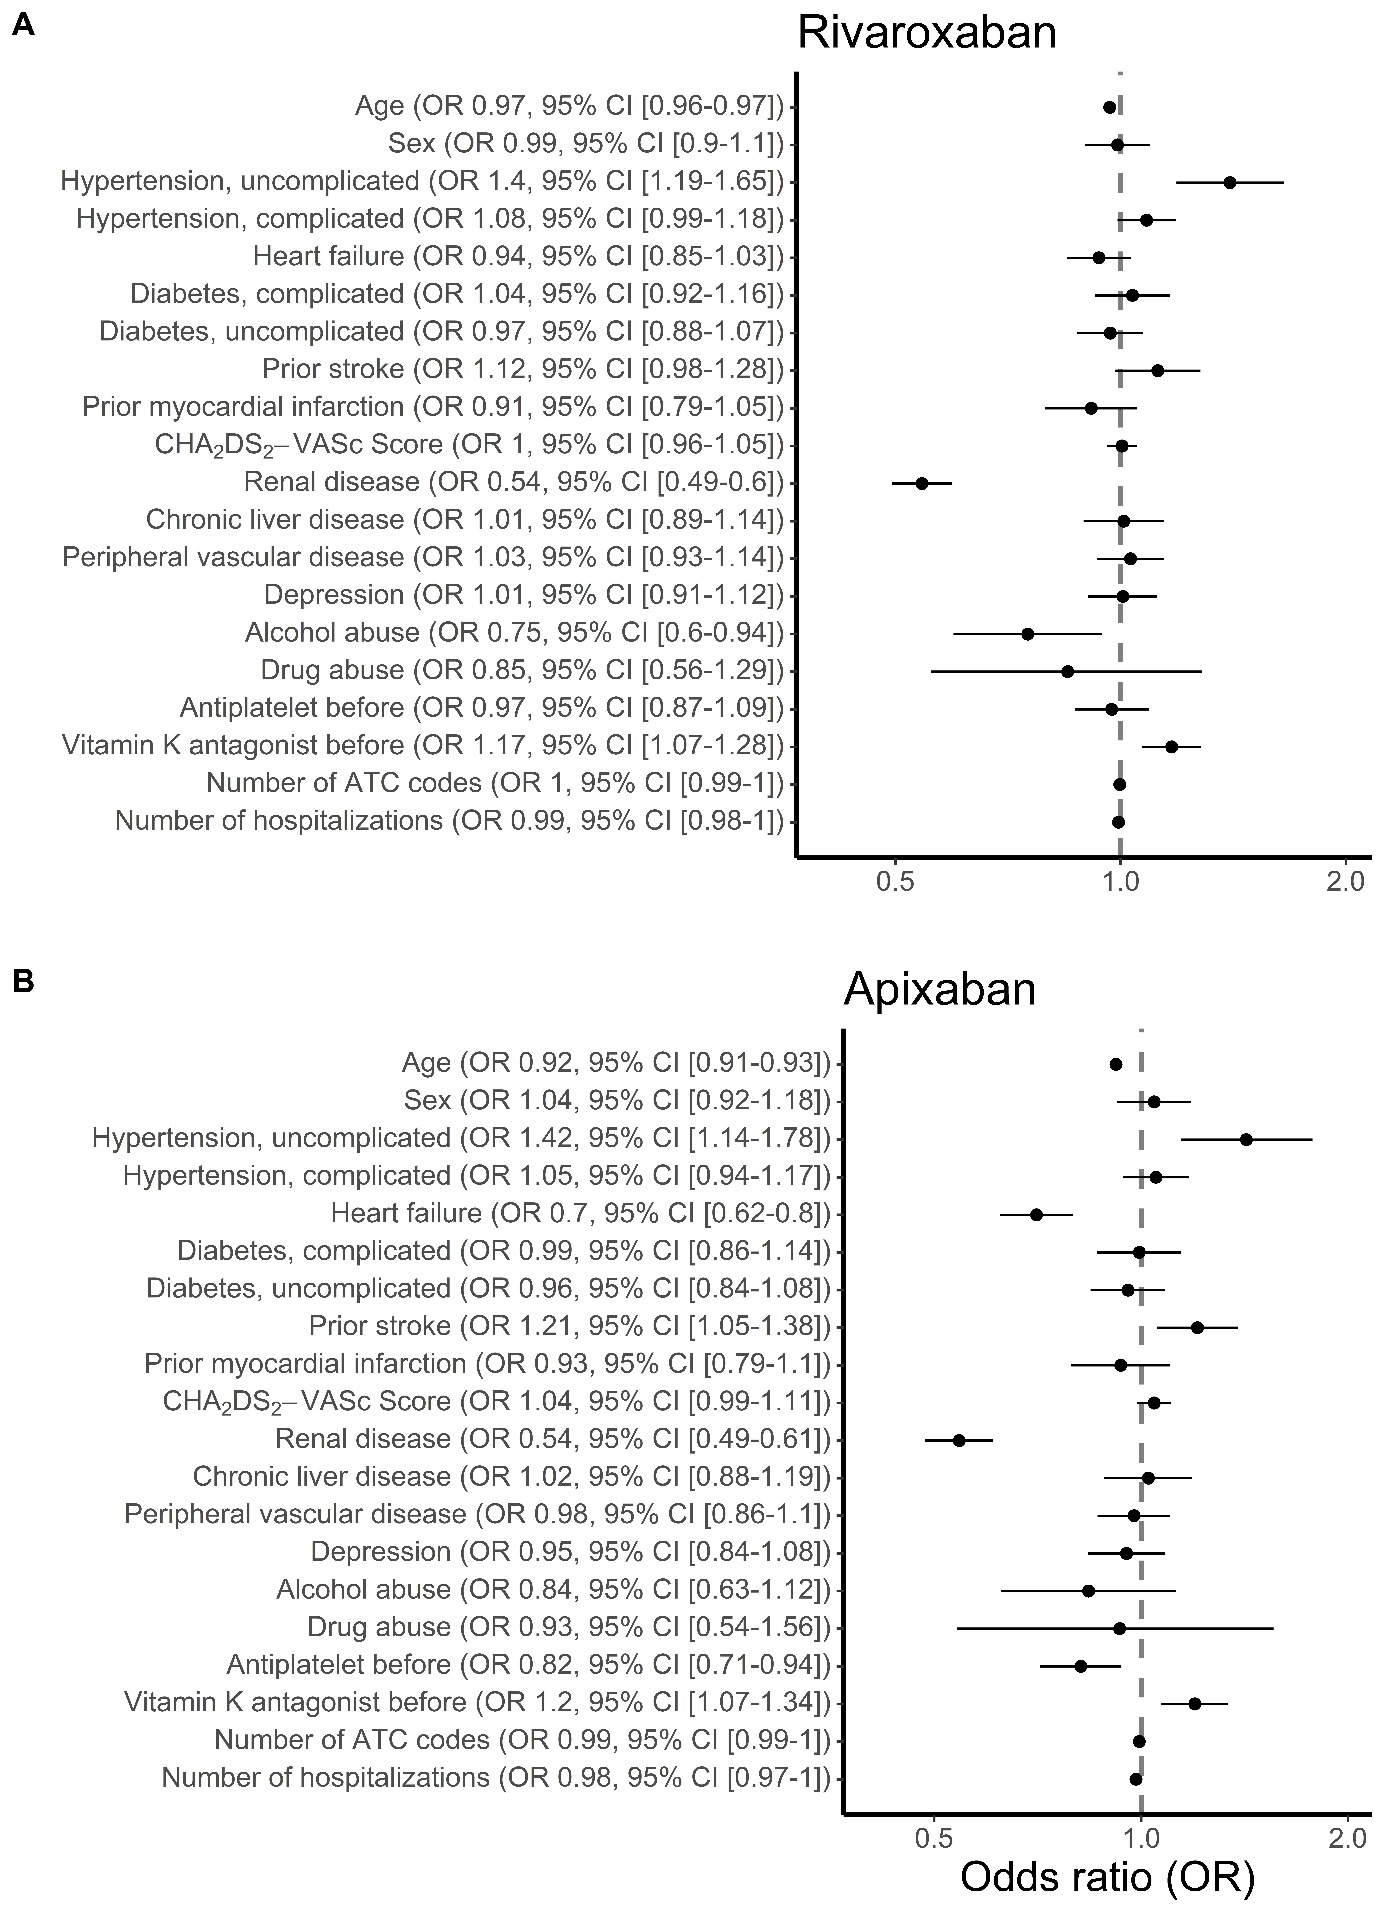


**Supplementary Figure 1:** Forest plot of effect estimates and 95% CI of covariates (for rivaroxaban and apixaban) after logistic regression of covariates as exposure and the dichotomized event of adherence above or below the cut-off as outcome.

Notes:

Shown in the forest plot are the effect estimates of the odds ratios for adherence above the cut-off (for all covariates). Also shown are the corresponding confidence intervals of the odds ratios.

**Supplementary Material 1.** AdhereR function parameters

To calculate the PDC (proportion of days covered), the CMA6 function from the AdhereR package was used:

PDC <- **CMA6**(data=ExamplePats,

ID.colname="ID",

event.date.colname="DATE",

event.duration.colname="REICHWEITE",

followup.window.start=0,

followup.window.duration= follow_up_time;

observation.window.start=0,

observation.window.duration= follow_up_time,

date.format="%m/%d/%Y");

According to the vignette of AdhereR (AdhereR: Adherence to Medications (r-project.org)), the CMA6 function first determines the days that were not covered by the medication (gap days). Based on this, the days of theoretical use are determined by subtracting the gap days from the observation interval. Finally, the PDC is calculated by taking the quotient of the number of days theoretically covered by medication and the number of days in the observation interval. The observation period starts at observation.window.start and the end of the observation period is calculated from observation.window.start + observation.window.duration. Using this function, the PDC was calculated for each patient individually depending on their index and end date.
